# Supplementary material
Source: Springer Nature journal article supplement (https://www.springermedizin.de/resource/supplementary/12936_2013_3691_MOESM3_ESM.pdf/9546248)

# Societal Perspective Tornado Analysis (Net Benefits)

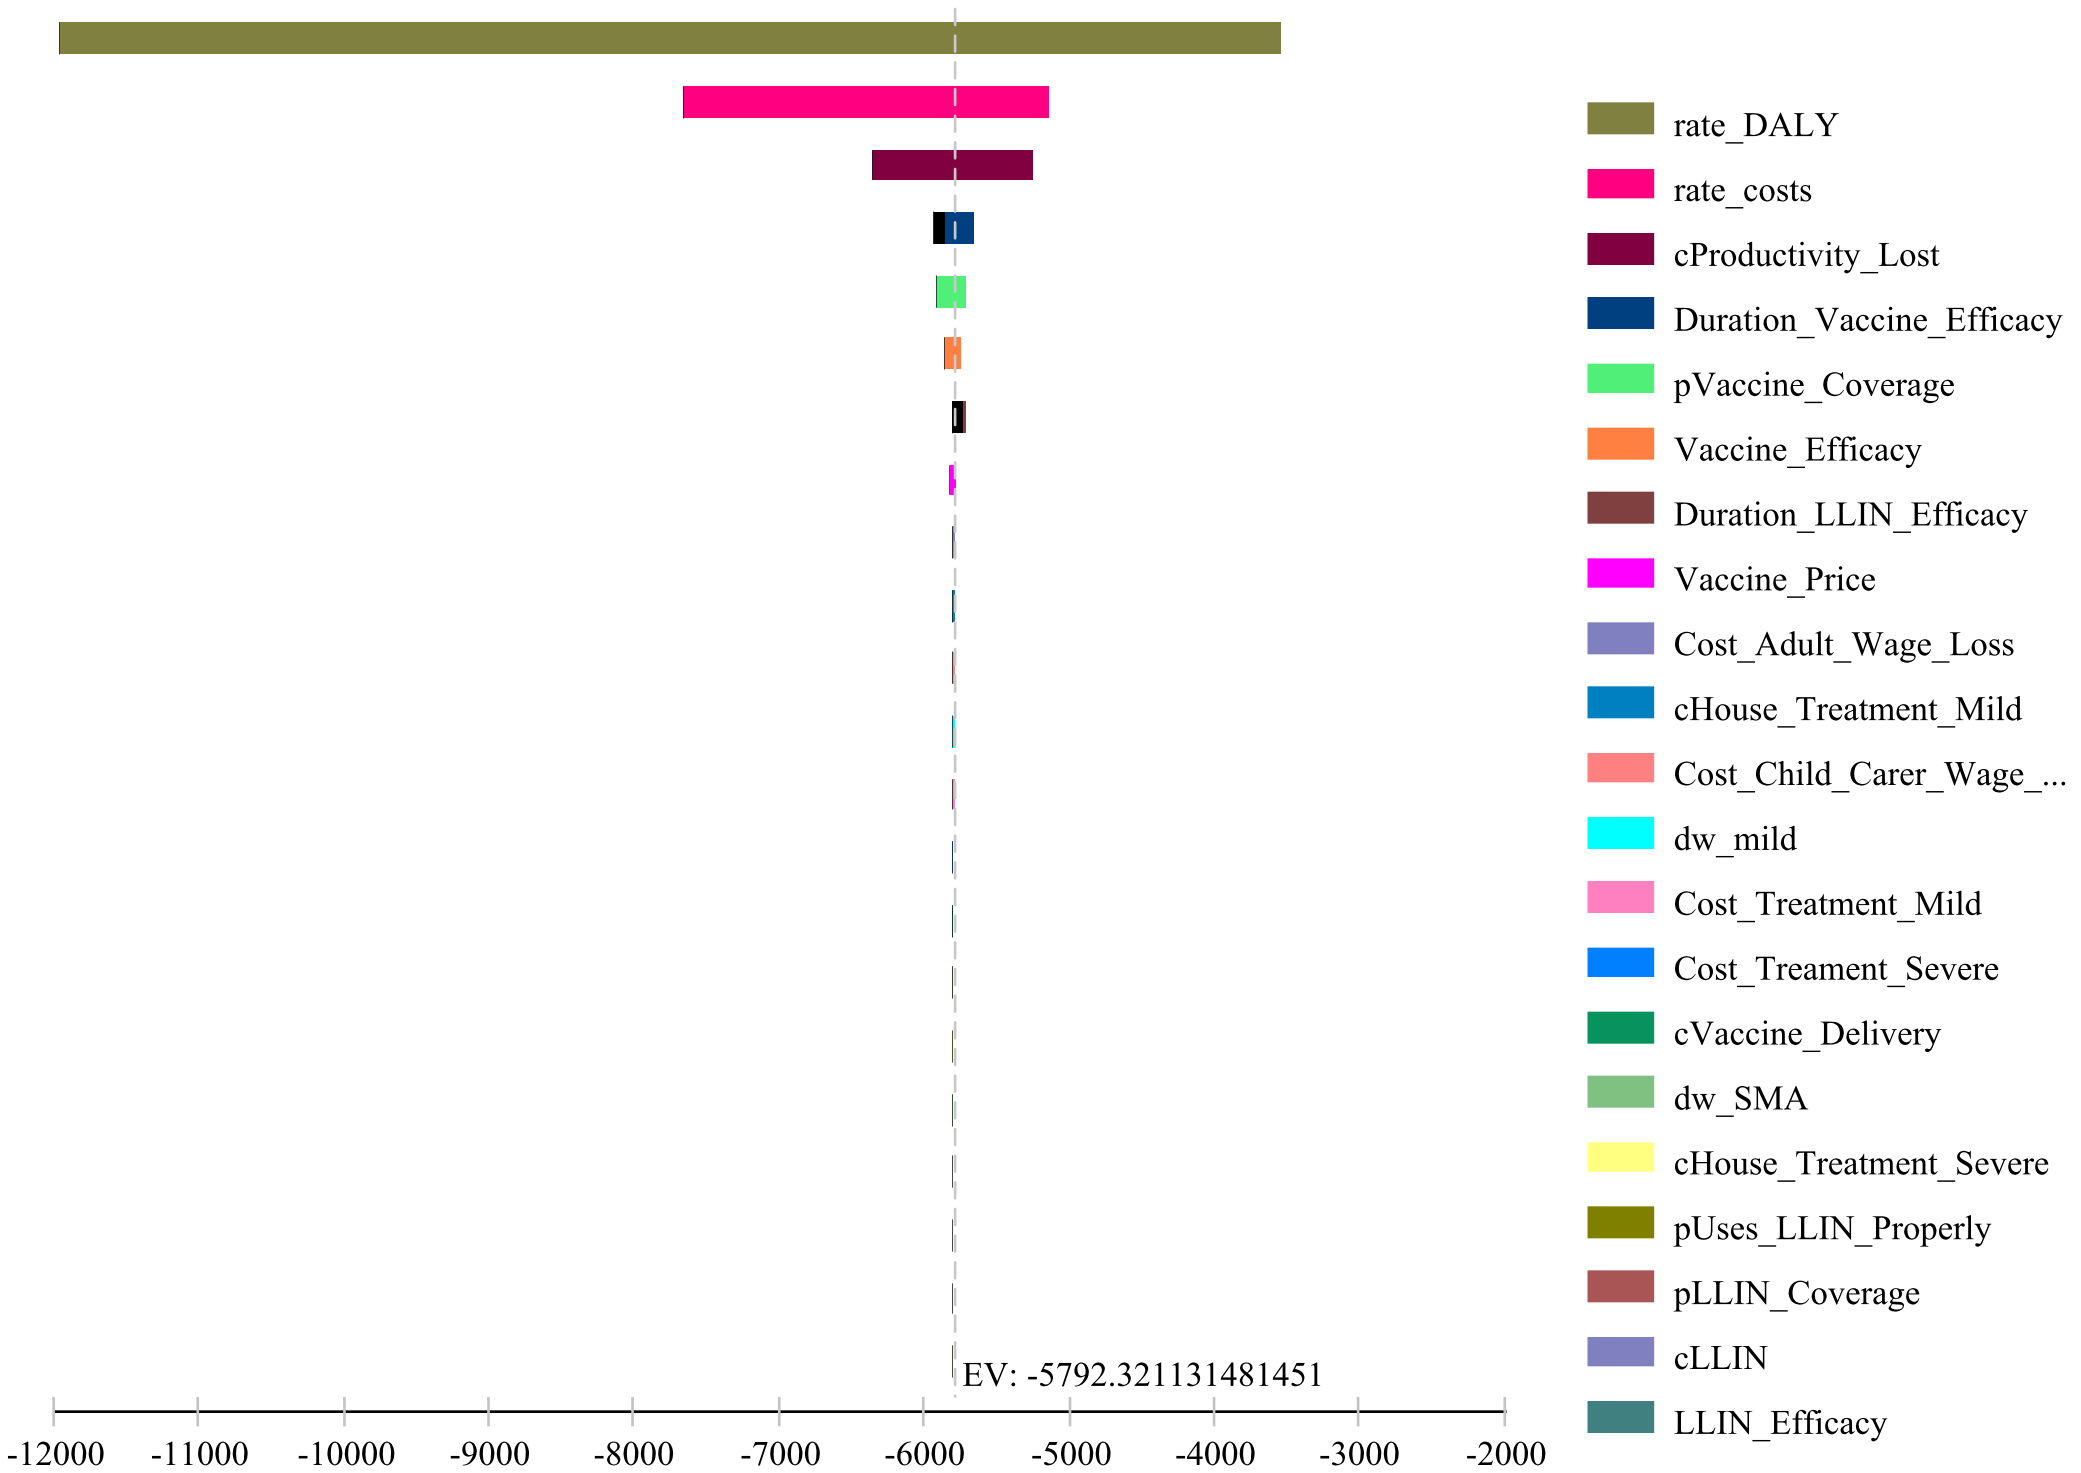

Supplement: MOESM3 [file 9546248]
